# Supplementary material for: A CURE on the Evolution of Antibiotic Resistance in Escherichia coli Improves Student Conceptual Understanding
Source: Atypon-hosted journal article supplement (doi:10.1187/cbe.21-12-0331), 2023-01-06
Supplement: combinedsupmats.pdf [file combinedsupmats.pdf]

# Supplemental Material

*CBE—Life Sciences Education*

Freeman *et al.*

## Supplemental material

### Table of Contents

| Section                                                                                                                        | Page # |
|--------------------------------------------------------------------------------------------------------------------------------|--------|
| I. Pre-post survey questions                                                                                                   | 3      |
| II. Overview of CURE activities                                                                                                | 6      |
| Table S1 The CURE sequence                                                                                                     |        |
| III. Scoring rubrics for open-response prompts                                                                                 | 7      |
| Table S2 Prompts and rubrics used to evaluate student understanding of the culture of scientific research                      |        |
| Table S3 Prompts and rubrics used to evaluate student understanding of experimental design                                     |        |
| Table S4 Prompts and rubrics used to evaluate student understanding of evolution by natural selection                          |        |
| IV. Sample sizes used in analyses                                                                                              | 11     |
| Table S5 Sample sizes by construct, disaggregated by demographic groups of interest                                            |        |
| V. Power analysis results                                                                                                      | 13     |
| Figure S1 Power analysis indicates the minimum size of each group required to detect an array of effect sizes for this dataset |        |
| VI. Regression output from the best models, each analysis                                                                      | 14     |
| 1. Culture of scientific research                                                                                              |        |
| Table S6 Regression output from best model: Thinking Like a Scientist analysis                                                 |        |
| Table S7 Regression output from best model: What it Means to Do Science analysis                                               |        |
| Table S8 Regression output from best models: Did You Do Real Research in Lab? Analysis                                         |        |
| 2. Experimental design                                                                                                         |        |
| Table S9 Regression output from best model: E-EDAT analysis                                                                    |        |

### 3. Evolution by natural selection

Table S10 Regression output from best models: E-ACORNS analysis

## I. Pre-post survey questions

The following instructions and questions were posted in the course management system.

NOTE: The items indicated by asterisks (\*; these did not appear on the actual survey) relate to student attitude or intent. Because they were either taken from a variety of published instruments or created for this study, we lack rigorous validity evidence on the constructs represented so treated the data as preliminary and exploratory.

Please give your best effort to answer the following questions. Some of them ask you to gauge your feelings on different issues, so just answer these honestly. Other questions ask you about biology topics; just answer these to the best of your ability without using any references or outside sources. Remember that you are not being graded for correctness, and that your answers will never be seen by any of the course instructors.

We've assigned the survey because the results will help us improve the introductory biology series at UW. The entire assignment should take you 20-25 minutes. Thank you so much for helping us make this course better!

\*The next 2 questions ask you to rate your level of interest in an activity. (Very Interested, Interested, Neither Interested nor Uninterested, Uninterested, Very Uninterested)

- How interested or uninterested are you in obtaining an undergrad research experience in the future?
- How interested or uninterested are you in pursuing a science-related research career?

\*The next 2 questions ask how likely you would be to do an activity. (Very Likely, Likely, Neither Likely nor Unlikely, Unlikely, Very Unlikely)

- How likely or unlikely do you think it is that you will be able to get a position as an undergraduate researcher during your remaining time in college, including summers
- If the Biology Department offered a one-time, 60-minute session on how to get an undergrad research experience, and if it fit conveniently in your schedule, how likely or unlikely would you be to attend?

\*Please reply "yes" or "no" to the next 2 questions, and explain, if asked.

- Have you done research as a UW student?
- Did you do research before coming to UW?
- If you replied "yes" to the prior question, please describe what research you did before coming to UW, and where you did this research.  
[If you replied "no" please type "no" again.]

The next 3 questions ask you what you think about 3 topics. Please just answer them honestly and thoughtfully.

(Open response)

- What does it mean to think like a scientist?
- What does it mean to do science?
- Did you perform what you would call real research in your BIOL 180 labs? Why or why not?

\*Please indicate how much you agree or disagree with each of the following statements.  
(Strongly disagree; Slightly disagree; Neither disagree or agree; Slightly Agree; Strongly agree)

- My BIOL *course#* lab experience taught me valuable skills.
- My BIOL *course#* lab experience helped prepare me for what I plan to do in life.
- My BIOL *course#* lab experience was not helpful to me.
- Experiments I did in BIOL *course#* labs will help solve a problem in the world.
- Results I obtained in BIOL *course#* labs were important to the scientific community.
- I faced challenges that I managed to overcome in my BIOL *course#* lab experiments.
- I was responsible for the outcomes of my BIOL *course#* lab experiments.
- My BIOL *course#* lab experiments addressed a question(s) that was important to me.
- The results I obtained in BIOL *course#* lab gave me a sense of personal achievement.
- My BIOL *course#* lab experiments were interesting.

\*The next 12 items ask you how confident you are that you can complete a task.

(1. Not at all. 2. (blank) 3. (blank) 4. A lot)

- How confident are you in your ability to use technical science skills? (tools, instruments, and techniques)
- How confident are you in your ability to use scientific language and terminology when presenting the results of an experiment?
- How confident are you in your ability to communicate the results of an experiment to a group of your peers?
- How confident are you in your ability to communicate the results of an experiment to a group of professional scientists?
- How confident are you in your ability to effectively divide the tasks between group members when working together on an experiment?
- How confident are you in your ability to work with a team to interpret data from an experiment?
- How confident are you in your ability to propose explanations for the results of a study?
- How confident are you in your ability to design a logical next experiment, based on the results of your experiment?
- How confident are you in your ability to relate results and explanations to the work of others?
- How confident are you in your ability to contribute to science?
- How confident are you in your ability to think scientifically?
- How confident are you in your ability to do science?

\*The following 5 questions ask how you think about yourself and your personal identity. Please indicate how much you agree or disagree with the statement.

(Strongly disagree; Slightly disagree; Neither disagree or agree; Slightly Agree; Strongly agree)

- I feel like I belong in the field of science.
- I have a strong sense of belonging to the community of scientists.
- Being able to do science is an important part of who I am.
- I am more like a scientist than I was before participating in BIOL *course#* labs.
- I have come to think of myself as a 'scientist'.

Please answer the next 2 questions to the best of your ability, without consulting any references.

- A species of snail (an animal) is poisonous. How would biologists explain how this species evolved from an ancestral species of snail that was not poisonous? In your answer, be sure to connect what is happening at the molecular (genetic) level to the level of the whole organism.

- A species of flightless bird (flightless birds, such as penguins, cannot fly) is closely related to bird species that are able to fly. How would biologists explain how a flightless bird species originated from an ancestral bird species that could fly? In your answer, be sure to connect what is happening at the molecular (genetic) level to the level of the whole organism.

On the post-survey, these prompts were changed to:

- One species of prosimians (animals) has long tarsi. How would biologists explain how this species with long tarsi evolved from an ancestral species of prosimian that had short tarsi? In your answer, be sure to connect what is happening at the molecular (genetic) level to the level of the whole organism.
- In one species of Suricata (animals), a pollex is absent. How would biologists explain how the Suricata species without a pollex evolved from an ancestral species of Suricata with a pollex? In your answer, be sure to connect what is happening at the molecular (genetic) level to the level of the whole organism.

Please answer the final question (below) to the best of your ability, without consulting any references.

- The claim has been made that women may be able to achieve significant improvements in memory by taking iron supplements. Prior to accepting this claim, and to determine whether or not this claim is fraudulent, you decide to perform a scientific experiment. Describe your proposed experiment and provide justifications for each aspect of your experimental design. Lastly, state whether the results of your experiment could prove the hypothesis that iron supplements enhance memory.

On the post-survey, this prompt was changed to:

- Advocates of herbal medicine claim that echinacea helps fight upper respiratory tract infections (colds and flu). Prior to accepting this claim, and to determine whether or not this claim is fraudulent, you decide to perform a scientific experiment. Describe your proposed experiment and provide justifications for each aspect of your experimental design. Lastly, state whether the results of your experiment could prove the hypothesis that echinacea is effective against colds and flu.”

## II. Overview of CURE activities

**Table S1** The CURE sequence

| <b>Course 1 (Bio 180)</b>                                                                                            | <b>Course 2 (Bio 200)</b>                                                                                                            |
|----------------------------------------------------------------------------------------------------------------------|--------------------------------------------------------------------------------------------------------------------------------------|
| Introduction to the model system, research question, and experimental design<br>Transfer cells to selective medium   | PCR candidate gene (antibiotic target)<br>Send PCR products out for sequencing                                                       |
| Select antibiotic-resistant cells<br>Begin daily transfers (experimental evolution)                                  | Analyze sequence data from antibiotic-resistant and -sensitive strains; identify differences if present                              |
| Introduction to data analysis in the software program R<br>Continue daily transfers                                  | Analyze 3-D structure of inferred protein product                                                                                    |
| Introduction to assays used to assess fitness and level-of-resistance<br>Practice with R<br>Conclude daily transfers | Prepare poster (one poster per team of four students)                                                                                |
| Set up fitness and resistance assays                                                                                 | Poster session in lobby of main biology building attended by classmates, department faculty and staff, members of students' families |
| Perform fitness and resistance assays                                                                                |                                                                                                                                      |
| Analyze fitness and resistance assays                                                                                |                                                                                                                                      |

### III. Scoring rubrics for open-response prompts

We used the prompts and rubrics provided in Tables S2, S3, and S4 to document changes in student understanding of three measures of learning other than exam scores.

#### Table S2 Prompts and rubrics used to evaluate student understanding of the culture of scientific research.

These prompts and rubrics were developed by Wachtell et al. (in review) and evaluate the culture of scientific research framework of Dewey et al. (2020).

##### A. Prompt 1: What does it mean to think like a scientist? (6 points possible)

| Category                   | Explanation/examples                                              |
|----------------------------|-------------------------------------------------------------------|
| Asking questions           | Curiosity, extend frontier of knowledge                           |
| Process thinking           | Hypothesis testing, experimental design                           |
| Critical thinking          | Skepticism, demanding evidence, quality assurance, rigor          |
| Evidence-based conclusions | Data-based reasoning                                              |
| Open-minded                | Consider alternatives, multiple perspectives                      |
| Multiple approaches        | Most convincing evidence is based on multiple independent sources |

##### B. Prompt 2: What does it mean to do science? (15 points possible)

| Category     | Sub-element                                          |
|--------------|------------------------------------------------------|
| Investigate  | Consult prior studies                                |
|              | Observe natural world                                |
|              | Ask a question                                       |
| Collect data | Perform an experiment or collect observational data  |
|              | Test a hypothesis                                    |
|              | Repeat the experiment to verify the result           |
| Analyze data | Analyze data (include visualization)                 |
|              | Interpret data                                       |
|              | Patterns may lead to models                          |
| Collaborate  | Work in a team                                       |
|              | Exchange information and ideas among team members    |
|              | Jointly produce information for dissemination        |
| Communicate  | Share results with community (papers, posters, etc.) |
|              | Undergo peer review                                  |
|              | Replicate other teams' findings                      |



(Table S2, continued)

*C. Prompt 3: Did you perform what you would call real research in your BIOL 180 labs? Why or why not? (15 points possible)*

| <b>Category</b>           | <b>Sub-element</b>                           |
|---------------------------|----------------------------------------------|
| Authenticity              | New knowledge                                |
|                           | Relevance to scientific community            |
| Processes                 | Collaboration                                |
|                           | Used publication-standard techniques         |
|                           | Understand how and why the techniques work   |
|                           | No right/wrong data                          |
| Iteration                 | Troubleshoot                                 |
|                           | Repeat experiments                           |
| Connections to other work | Work continued over course of term           |
|                           | Work will continue beyond the class          |
|                           | Communicate results                          |
| Ownership                 | Work on own question and/or hypothesis       |
|                           | Design the experiment                        |
|                           | Carry out the experiment or observations     |
|                           | Be responsible for the integrity of the data |

**Table S3 Prompts and rubrics used to evaluate student understanding of experimental design**

These rubrics evaluate prompts that were variations on the following example: “Advertisements for an herbal product, ginseng, claim that it promotes endurance. Prior to accepting this claim, and to determine whether or not this claim is fraudulent, you decide to perform a scientific experiment. Describe your proposed experiment and provide justifications for each aspect of your experimental design. Lastly, state whether the results of your experiment could prove the hypothesis that ginseng promotes endurance. This should take you approximately 10-15 minutes to complete.” There are 17 points possible; the complete rubric with examples is given in Appendix C.2 in Brownell et al. (2014).

|                                                               | <b>0 points answer</b>                                        | <b>1 point answer</b>                                                                          | <b>2 point answer</b>                                                                                              |
|---------------------------------------------------------------|---------------------------------------------------------------|------------------------------------------------------------------------------------------------|--------------------------------------------------------------------------------------------------------------------|
| 1. Identifies variable that will be manipulated               | Other than ginseng                                            | Ginseng OR herbal product                                                                      | N/A                                                                                                                |
| 2. Identifies variable that will be measured.                 | Other than endurance                                          | Endurance                                                                                      | N/A                                                                                                                |
| 3. Describes how dependent variable will be measured.         | Not mentioned or too subjective to be verified                | Reasonable outcome measure but no specifics/units.                                             | Reasonable outcome measure with specifics/units.                                                                   |
| 4. Realization that other variables need to be held constant. | Not mentioned OR related to independent variable              | Stated one reasonable variable that could be controlled                                        | Stated two or more reasonable variables that could be controlled                                                   |
| 5. Control for vehicle effect                                 | Not mentioned                                                 | Recognize need for placebo but no/insufficient reasoning                                       | Recognize need for placebo and supply correct reasoning                                                            |
| 6. Sample size                                                | Not mentioned                                                 | State “large sample size” but provide no/vague reasoning                                       | State “large sample size” and provide correct reasoning                                                            |
| 7a. Repeat experiment                                         | Not mentioned OR “NO”, OR a possibility                       | Yes, recognizes need                                                                           | N/A                                                                                                                |
| 7b. Reasoning for repeating experiment                        | No explanation given OR incorrect reasoning                   | “Increase validity of results” but vague                                                       | Provide appropriate justification                                                                                  |
| 8a. Conclusions that could be drawn                           | Not mentioned OR stated only as part of hypothesis/prediction | States what conclusion can be drawn but does not qualify the conclusion                        | States what conclusion can be drawn and qualifies the conclusion (e.g. sources of error, limits to generalization) |
| 8b. Results cannot prove your hypothesis                      | Not mentioned OR YES, can prove hypothesis                    | Recognition that you “cannot prove a hypothesis: but did not provide any reasoning/explanation | Recognition that you can only “disprove a hypothesis” or “build support for a hypothesis”                          |

**Table S4 Prompts and rubrics used to evaluate student understanding of evolution by natural selection**

These rubrics evaluate prompts that had the form “A species of *taxon name* is *trait state*. How would biologists explain how this species evolved from an ancestral species of *taxon name* is that was not *trait state*? In your answer, be sure to connect what is happening at the molecular (genetic) level to the level of the whole organism.” There 15 points possible in the expert-like assessment and 4 points possible in the naïve ideas assessment (Sievers et al., accepted with minor revisions).

A. Expert-like ideas

| Core Concept                                | Novice                                          | Intermediate                                      | Advanced                                              |
|---------------------------------------------|-------------------------------------------------|---------------------------------------------------|-------------------------------------------------------|
| 1. Nature of mutation                       | Mutation occurs,                                | creates heritable variation,                      | and is random with respect to fitness.                |
| 2. Variation in populations                 | Variation in populations exists,                | is based on a diversity of alleles,               | and exists independently of environmental conditions. |
| 3. Genotype to phenotype                    | Mutations change genotypes                      | and may change gene products,                     | and, if so, change phenotypes.                        |
| 4. Phenotype to fitness (natural selection) | Traits vary in their impact on fitness,         | leading to differential reproductive success      | in a specific environment.                            |
| 5. Evolution                                | Evolution occurs when trait frequencies change, | or more precisely when allele frequencies change, | due to the fitness advantage of a trait.              |

B. Naïve ideas

|                                                                           | 0 points   | -1 points                                                                                                                               |
|---------------------------------------------------------------------------|------------|-----------------------------------------------------------------------------------------------------------------------------------------|
| Teleological or anthropomorphic causation (purposeful/“conscious” change) | No mention | Mutations occur in response to a change in the environment, or traits change due to want or need.                                       |
| Inheritance of acquired characters                                        | No mention | Traits change due to use/disuse, “exertion,” or interaction with the environment, with an implication that these changes are inherited. |
| Naïve group selectionism                                                  | No mention | Changes happen “for the good of the species.”                                                                                           |
| Essentialism                                                              | No mention | All individuals in a population change at once, or adaptation is conflated with speciation.                                             |

#### IV. Sample sizes used in the analyses

Average totals for the total number of students in each treatment who responded to each construct or prompt are reported in Table 1 in the main text. The sample sizes reported here, in Table S7, are relevant to the power analysis and to the models that tested for disproportionate impacts on minoritized students. In each table, “Trad” refers to traditional labs; “ContGen” refers to continuing generation students—meaning not-1stGen. Numbers vary among constructs and prompts due to missing data.

**Table S5** Sample sizes by construct, disaggregated by demographic groups of interest

##### A) Culture of scientific research prompts

|           | “What does it mean to do science?” |      |  | “What does it mean to think like a scientist?” |      |  | “Did you do real research in your <i>coursename</i> lab?” |      |
|-----------|------------------------------------|------|--|------------------------------------------------|------|--|-----------------------------------------------------------|------|
|           | Treatment group                    |      |  | Treatment group                                |      |  | Treatment group                                           |      |
|           | CURE                               | Trad |  | CURE                                           | Trad |  | CURE                                                      | Trad |
| URM       | 14                                 | 67   |  | 14                                             | 67   |  | 16                                                        | 70   |
| NonURM    | 149                                | 159  |  | 149                                            | 159  |  | 154                                                       | 159  |
| LowSES    | 28                                 | 119  |  | 28                                             | 119  |  | 32                                                        | 122  |
| HighSES   | 150                                | 118  |  | 150                                            | 118  |  | 154                                                       | 118  |
| Female    | 114                                | 158  |  | 114                                            | 158  |  | 118                                                       | 160  |
| Male      | 64                                 | 79   |  | 64                                             | 79   |  | 68                                                        | 80   |
| First Gen | 37                                 | 79   |  | 37                                             | 79   |  | 21                                                        | 81   |
| ContGen   | 140                                | 156  |  | 140                                            | 156  |  | 144                                                       | 158  |

##### B) Experimental design prompt

|           | E-EDAT          |      |
|-----------|-----------------|------|
|           | Treatment group |      |
|           | CURE            | Trad |
| URM       | 14              | 58   |
| NonURM    | 148             | 141  |
| LowSES    | 28              | 103  |
| HighSES   | 148             | 106  |
| Female    | 111             | 142  |
| Male      | 65              | 67   |
| First Gen | 37              | 69   |
| ContGen   | 138             | 138  |

C) Evolution by natural selection prompts

|           | E-ACORNS, trait gain |      |  | E-ACORNS, trait loss |      |
|-----------|----------------------|------|--|----------------------|------|
|           | Treatment group      |      |  | Treatment group      |      |
|           | CURE                 | Trad |  | CURE                 | Trad |
| URM       | 14                   | 66   |  | 15                   | 66   |
| NonURM    | 149                  | 156  |  | 149                  | 142  |
| LowSES    | 28                   | 114  |  | 29                   | 108  |
| HighSES   | 151                  | 118  |  | 150                  | 110  |
| Female    | 114                  | 154  |  | 112                  | 141  |
| Male      | 65                   | 78   |  | 67                   | 77   |
| First Gen | 37                   | 75   |  | 37                   | 69   |
| ContGen   | 141                  | 155  |  | 141                  | 147  |

## V. Power analysis results

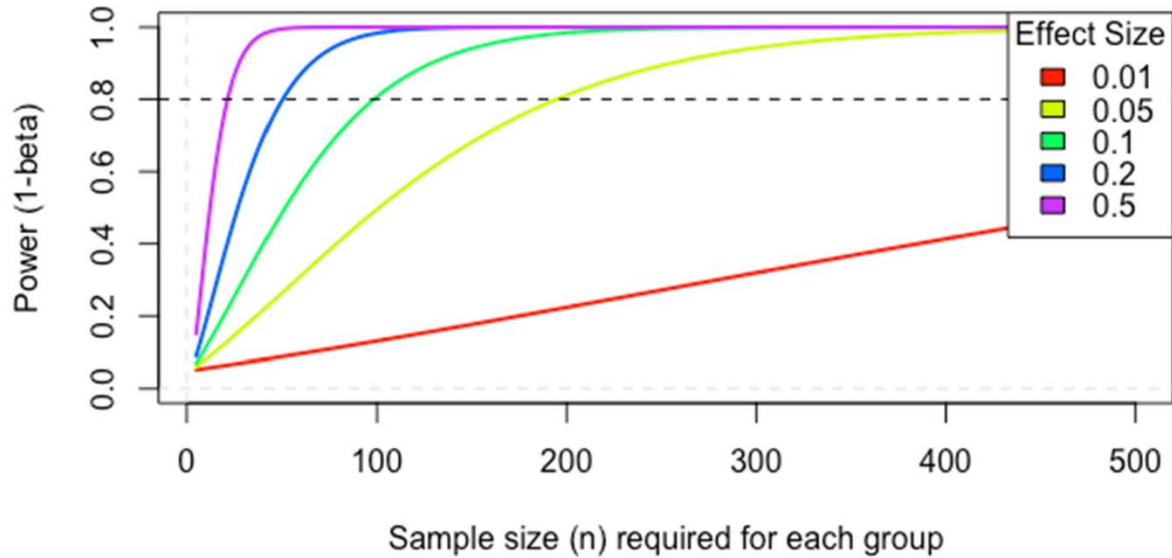

**Figure 1** Power analysis indicates the minimum size of each group required to detect an array of effect sizes for this dataset

Following Kraft (2020), we considered effect sizes of 0.20 and above as large (lavendar to blue lines), 0.05 to less than 0.20 as medium (blue to chartreuse line), and less than 0.05 as small (chartreuse to red lines). Note that a lime-green line at effect size 0.1 is present to aid interpretation. Effect size is measured as Cohen's  $f^2$  at a two-tailed  $p = 0.05$ .

## VI. Regression output from the best models, each analysis

Data for the analysis of exam scores, as an index of learning and of course performance, are given in Table 2 of the main paper.

### *Other measures of learning*

#### 1. *Culture of scientific research*

##### **Table S6 Regression output from best model: Thinking Like a Scientist analysis**

The dependent variable was the sum of points scored on a 6-point rubric (see Wachtell et al., in prep).

Binary sex, URM status, SES status, first-generation status, and SAT score were not retained as predictors in the best model; SAT score and Treatment were also not retained as a predictor in the best model.

|           | <u>Estimate</u> | <u>SE</u> | <u>t-value</u> | <u>p-value</u> |
|-----------|-----------------|-----------|----------------|----------------|
| Intercept | -1.94           | 0.09      | -22.2          | <<0.001        |
| PreScore  | 0.17            | 0.06      | 2.8            | 0.006          |

##### **Table S7 Regression output from best model: What it Means to Do Science analysis**

The dependent variable was the sum of points on a 15-point rubric (see Wachtell et al., in prep). Binary sex, URM status, SES status, and first-generation status were not retained as predictors in the best model.

|                      | <u>Estimate</u> | <u>SE</u> | <u>z-value</u> | <u>p-value</u> |
|----------------------|-----------------|-----------|----------------|----------------|
| (Intercept)          | -2.87           | 0.08      | -36.2          | <<0.001        |
| PreScore             | 0.12            | 0.03      | 4.2            | <0.001         |
| SAT total score      | 0.002           | 0.0003    | 7.2            | <<0.001        |
| Treatment (Ref:CURE) | -0.15           | 0.08      | -1.92          | 0.055          |

**Table S8 Regression output from best models: Did You Do Real Research in Lab? analysis**

- a) The initial model in this analysis was a binomial regression assessing whether students were more likely to answer yes or no to this question, based on the predictors. Binary sex, URM status, SES status, first-generation status, and SAT total score were not retained as predictors in the best model.

|           | Estimate | SE   | z-value | p-value  |
|-----------|----------|------|---------|----------|
| Intercept | 0.28     | 0.10 | 2.2     | 0.03     |
| Treatment | 1.29     | 0.23 | 5.5     | <<0.0001 |

- b) The second model in this analysis was a binomial regression with the outcome variable being whether students were more likely to provide valid warrants on the 15-point “Real Research” rubric explaining why labs represented real research, based on the predictors. Binary sex, URM status, SES status, first-generation status, and SAT total score were not retained in the best model.

|           | Estimate | SE   | z-value | p-value  |
|-----------|----------|------|---------|----------|
| Intercept | -0.66    | 0.14 | -4.8    | <0.001   |
| Treatment | 1.11     | 0.20 | 5.5     | <<0.0001 |

- c) The third and final model in this analysis was a binomial regression assessing whether students were more likely to provide valid warrants on the “Real Research” rubric, explaining why labs did *not* represent real research, based on the predictors. Binary sex, URM status, SES status, first-generation status, and SAT total score were not retained in the best model.

|           | Estimate | SE   | z-value | p-value  |
|-----------|----------|------|---------|----------|
| Intercept | -0.71    | 0.14 | -5.2    | <0.0001  |
| Treatment | -1.35    | 0.27 | 5.0     | <<0.0001 |



2. *Experimental design*

**Table S9 Regression output from best model: E-EDAT analysis**

These data are from a linear model testing the impact of an array of predictors on the total E-EDAT score (15-point rubric).

|                 | Estimate | SE     | z-value | p-value  |
|-----------------|----------|--------|---------|----------|
| Intercept       | -1.54    | 0.10   | -17.6   | <<0.0001 |
| PreScore        | 0.07     | 0.01   | 5.2     | <0.0001  |
| SAT total score | 0.0008   | 0.0002 | 3.7     | 0.0002   |

3. *Evolution by natural selection*

**Table S10 Regression output from best models: E-ACORNS analysis**

a) The initial model in this analysis was a linear regression assessing which variables best-predicted total score on the E-ACORNS rubric, in response to a question about trait gain. Binary sex, URM status, SES status, first-generation status, and SAT total score were not retained as predictors in the best model.

|           | Estimate | SE   | z-value | p-value  |
|-----------|----------|------|---------|----------|
| Intercept | -1.86    | 0.08 | -24.7   | <<0.0001 |
| PreScore  | 0.04     | 0.02 | 3.9     | <0.0001  |
| Treatment | 0.40     | 0.07 | 6.2     | <<0.0001 |

b) The second model in this analysis was a linear regression assessing which variables best-predicted the total number of misconceptions on the E-ACORNS rubric that students declared in response to a question about trait gain. Treatment, binary sex, URM status, SES status, and first-generation status were not retained as predictors in the best model. Students with higher SAT scores were more likely to declare misconceptions, independent of treatment.

|                 | Estimate | SE    | z-value | p-value  |
|-----------------|----------|-------|---------|----------|
| Intercept       | -10.33   | 2.93  | -3.5    | <<0.0001 |
| SAT total score | 0.005    | 0.002 | 2.6     | 0.009    |

- c) The third model in this analysis was a linear regression assessing which variables best-predicted total score on the E-ACORNS rubric, in response to a question about trait loss. URM status, SES status, first-generation status, and SAT total score were not retained as predictors in the best model. Female students had higher scores than male students, on average, independent of treatment.

|                 | <u>Estimate</u> | <u>SE</u> | <u>z-value</u> | <u>p-value</u> |
|-----------------|-----------------|-----------|----------------|----------------|
| Intercept       | -2.04           | 0.08      | -25.5          | <<0.0001       |
| PreScore        | 0.05            | 0.02      | 3.0            | 0.003          |
| SAT total score | 0.0009          | 0.0002    | 3.4            | 0.0006         |
| Treatment       | 0.26            | 0.07      | 3.8            | 0.0002         |
| Sex             | 0.16            | 0.07      | 2.2            | 0.025          |

- d) The final model in this analysis was a linear regression assessing which variables best-predicted the total number of misconceptions on the E-ACORNS rubric that students declared in response to a question about trait loss. The null model provided the best fit to the data.

|           | <u>Estimate</u> | <u>SE</u> | <u>z-value</u> | <u>p-value</u> |
|-----------|-----------------|-----------|----------------|----------------|
| Intercept | -2.47           | 0.19      | -13.2          | <<0.0001       |
